# Supplementary material for: Microfungi Associated with Peach Branch Diseases in China
Source: MDPI journal article supplement (doi:10.3390/jof10030217), 2024-03-15
Supplement: s1 [file s1]

**Supplementary Table 1** Strains used in phylogenetic analyses and their GenBank accession numbers.

| Species                       | Isolate            | GenBank accession numbers |             |             |             |          |            |
|-------------------------------|--------------------|---------------------------|-------------|-------------|-------------|----------|------------|
|                               |                    | ITS                       | <i>tef1</i> | <i>tub2</i> | <i>rpb2</i> | LSU      | <i>act</i> |
| <i>Ascochyta astragalina</i>  | <b>CBS 113797T</b> | MH862944                  |             | KT389776    |             | MH874509 |            |
| <i>A. benningiorum</i>        | <b>CBS 144957T</b> | MN823432                  |             | MN824755    | MN824606    | MN823432 |            |
| <i>A. boeremae</i>            | <b>CBS 372.84T</b> | KT389480                  |             | KT389774    |             | KT389697 |            |
| <i>A. boeremae</i>            | CBS 373.84         | KT389481                  |             | KT389775    | KT389560    | KT389698 |            |
| <i>A. clinopodiicola</i>      | CBS 123526         | MT005692                  |             | MT005692    |             | MN943792 |            |
| <i>A. fabae</i>               | CBS 524.77         | GU237880                  |             | GU237526    |             | GU237963 |            |
| <i>A. fabae</i>               | CBS 649.71         | GU237902                  |             | GU237527    |             | GU237964 |            |
| <i>A. herbicola</i>           | CBS 629.97         | GU237898                  |             | GU237614    | KP330421    | GU238083 |            |
| <i>A. lentis</i>              | CBS 370.84         | KT389474                  |             | KT389768    |             | KT389691 |            |
| <i>A. medicaginicola</i> var. | BRIP 45051         | KY742044                  |             | KY742286    | KY742132    | KY742198 |            |
| <i>A. medicaginicola</i> var. | CBS 404.65         | GU237859                  |             | GU237629    | KP330423    | GU238102 |            |
| <i>A. nigripycnidia</i>       | <b>CBS 116.96T</b> | GU237756                  |             | GU237637    |             | GU238118 |            |
| <i>A. phacae</i>              | <b>CBS 184.55T</b> | KT389475                  |             | KT389769    |             | KT389692 |            |
| <i>A. pisi</i>                | CBS 122751         | KP330432                  |             | KP330388    | EU874867    | KP330444 |            |
| <i>A. pisi</i>                | CBS 12654          | GU237772                  |             | GU237531    | DQ677967    | EU754137 |            |
| <i>A. prunus</i>              | JZB380109          | OP753589                  |             | OP998335    | OP966808    | OP753661 |            |
| <i>A. prunus</i>              | JZB380110          | OP753590                  |             | OP998336    | OP966809    | OP753662 |            |
| <i>A. prunus</i>              | JZB380111          | OP753591                  |             | OP998337    | OP966810    | OP753663 |            |
| <i>A. prunus</i>              | JZB380112          | OP753592                  |             | OP998338    |             | OP753664 |            |
| <i>A. prunus</i>              | JZB380113          | OP753593                  |             |             | OP966811    | OP753665 |            |
| <i>A. prunus</i>              | JZB380114          | OP753594                  |             | OP998339    |             | OP753666 |            |
| <i>A. prunus</i>              | JZB380115          | OP753595                  |             | OP998340    | OP966812    | OP753667 |            |
| <i>A. prunus</i>              | JZB380116          | OP753596                  |             | OP998341    | OP966813    | OP753668 |            |

| Species                     | Isolate            | GenBank accession numbers |             |             |             |          |
|-----------------------------|--------------------|---------------------------|-------------|-------------|-------------|----------|
|                             |                    | ITS                       | <i>tef1</i> | <i>tub2</i> | <i>rpb2</i> | LSU      |
| <i>A. rabiei</i>            | CBS 206.30         | KT389478                  |             | KT389772    | KT389559    | KT389695 |
| <b><i>A. rabiei</i></b>     | <b>CBS 237.37T</b> | KT389479                  |             | KT389773    |             | KT389696 |
| <i>A. syringae</i>          | CBS 545.72         | KT389483                  |             | KT389777    |             | KT389700 |
| <i>A. viciae</i>            | CBS 451.68         | KT389484                  |             | KT389778    | KT389562    | KT389701 |
| <i>A. viciae-pannonicae</i> | CBS 254.92         | KT389485                  |             | KT389779    |             | KT389702 |
| <i>Didymella aerea</i>      | CGMCC 3.18353      | KY742051                  |             | KY742293    | KY742137    | KY742205 |
| <i>D. aliena</i>            | CBS 379.93         | GU237851                  |             | GU237578    | KP330416    | GU238037 |
| <i>D. aliena</i>            | CBS 378.93         | MN973539                  |             | MT005642    | MT018169    | MN943746 |
| <i>D. aliena</i>            | CBS 877.97         | GU237910                  |             | GU237579    | MT018168    |          |
| <i>D. americana</i>         | CBS 185.85         | FJ426972                  |             | FJ427088    | KT389594    | GU237990 |
| <i>D. americana</i>         | LC 5157            | KY742054                  |             | KY742296    | KY742139    | KY742208 |
| <i>D. americana</i>         | CBS 120140         | MN973532                  |             | MT005635    | MT018155    | MN943739 |
| <i>D. anserina</i>          | CBS 167.42         | MH856110                  |             |             | MT018152    | MH867609 |
| <i>D. anserina</i>          | CBS 397.65         | MH85863                   |             | KT38979     | KT389597    | MH870273 |
| <i>D. anserina</i>          | CBS 285.29         | MH855074                  |             | KT389796    | MT018151    | MH866534 |
| <b><i>D. aurea</i></b>      | <b>CBS 269.93T</b> | GU237818                  |             | GU237557    | KT389599    | GU237999 |
| <b><i>D. gardeniae</i></b>  | <b>CBS 626.68T</b> | FJ427003                  |             | FJ427114    | KT389606    | GQ387595 |
| <i>D. gardeniae</i>         | CBS 302.79         | FJ427002                  |             | FJ427113    | MT018156    |          |
| <i>D. glomerata</i>         | LC 8124            | KY742063                  |             | KY742305    | KY742148    | KY742217 |
| <i>D. glomerata</i>         | CBS 128899         | MH865146                  |             |             | MT018147    | MH876585 |
| <i>D. glomerata</i>         | JZB380117          | OP753597                  |             | OQ032564    | OP966814    | OP753669 |
| <i>D. glomerata</i>         | JZB380118          | OP753598                  |             | OQ032565    | OP966815    | OP753670 |
| <i>D. glomerata</i>         | JZB380119          | OP753599                  |             | OQ032566    | OP966816    | OP753671 |
| <i>D. glomerata</i>         | JZB380120          | OP753600                  |             | OQ032567    | OP966817    | OP753672 |

| Species                              | Isolate            | GenBank accession numbers |             |             |             |          |
|--------------------------------------|--------------------|---------------------------|-------------|-------------|-------------|----------|
|                                      |                    | ITS                       | <i>tef1</i> | <i>tub2</i> | <i>rpb2</i> | LSU      |
| <i>D. glomerata</i>                  | JZB380121          | OP753601                  |             | OQ032568    | OP966818    | OP753673 |
| <i>D. glomerata</i>                  | JZB380122          | OP753602                  |             | OQ032569    | OP966819    | OP753674 |
| <b><i>D. heteroderae</i></b>         | <b>CBS 109.92T</b> | FJ426983                  |             | FJ427098    | KT389601    | GU238002 |
| <i>D. heteroderae</i>                | LC 8125            | KY742064                  |             | KY742306    | KY742149    | KY742218 |
| <i>D. longicolla</i>                 | CBS 347 82         | GU237836                  |             | GU237621    | MT018160    |          |
| <b><i>D. longicolla</i></b>          | <b>CBS 124514T</b> | MH863382                  |             | GU237622    | MT018161    |          |
| <i>D. nigricans</i>                  | CBS 444.81         | GU237867                  |             | GU237558    |             | GU238000 |
| <i>D. nigricans</i>                  | PD 77/919          | GU237915                  |             | GU237559    | KT389611    | GU238001 |
| <i>D. prosopidis</i>                 | CBS 136414         |                           |             | MT005631    | MT018149    |          |
| <i>D. prosopidis</i>                 | CBS 136550         | MH866094                  |             |             | MT018150    | MH877632 |
| <b><i>D. protuberans</i></b>         | <b>CBS 381.96T</b> | GU237853                  |             | GU237574    | KT389620    | GU238029 |
| <i>D. protuberans</i>                | CBS 391.93         | GU237858                  |             | GU237566    | KT389621    | GU238015 |
| <i>D. sinensis</i>                   | CGMCC 3.18348      | KY742085                  |             | KY742327    | MT018127    | KY742239 |
| <b><i>Nothophoma anigozanthi</i></b> | <b>CBS 381.91T</b> | GU237852                  |             | GU237580    | KT389655    | GU238039 |
| <i>N. gossypicola</i>                | CBS 377.67         | GU237845                  |             | GU237611    | KT389658    | GU238079 |
| <b><i>N. macrospora</i></b>          | <b>CBS 140674T</b> | NR158272                  |             | LN880539    |             |          |
| <i>N. pruni</i>                      | JZB380123          | OP753603                  |             | OQ032570    | OP998319    | OP753675 |
| <i>N. pruni</i>                      | JZB380124          | OP753604                  |             | OQ032571    |             | OP753676 |
| <i>N. pruni</i>                      | JZB380125          | OP753605                  |             | OQ032572    | OP998320    | OP753677 |
| <i>N. pruni</i>                      | JZB380126          | OP753606                  |             | OQ032573    | OP998321    | OP753678 |
| <i>N. pruni</i>                      | JZB380127          | OP753607                  |             | OQ032574    | OP998322    | OP753679 |
| <i>N. pruni</i>                      | JZB380128          | OP753608                  |             | OQ032575    |             | OP753680 |
| <i>N. pruni</i>                      | JZB380129          | OP753609                  |             | OQ032576    | OP998323    | OP753681 |
| <i>N. pruni</i>                      | JZB380130          | OP753610                  |             | OQ032577    | OP998324    | OP753682 |

| Species                        | Isolate            | GenBank accession numbers |             |             |             |          |            |
|--------------------------------|--------------------|---------------------------|-------------|-------------|-------------|----------|------------|
|                                |                    | ITS                       | <i>tef1</i> | <i>tub2</i> | <i>rpb2</i> | LSU      | <i>act</i> |
| <i>N. pruni</i>                | JZB380131          | OP753611                  |             | OQ032578    |             | OP753683 |            |
| <i>N. pruni</i>                | JZB380132          | OP753612                  |             | OQ032579    | OP998325    | OP753684 |            |
| <i>N. pruni</i>                | JZB380135          | OP753613                  |             | OQ032580    | OP998327    | OP753685 |            |
| <i>N. pruni</i>                | MFLUCC 18-1601     | MH827005                  |             | MH853669    | MH853662    | MH853662 |            |
| <i>N. pruni</i>                | MFLUCC 18-1600     | MH827007                  |             | MH853671    | MH853664    | MH827028 |            |
| <i>N. quercina</i>             | CBS 633.92         | GU237900                  |             | GU237609    | KT389657    | EU754127 |            |
| <i>N. quercina</i>             | UTHSC DI16-270     | LT592929                  |             | LT592998    |             | LT593067 |            |
| <i>N. quercina</i>             | JZB380133          | OP753614                  |             |             |             | OP753686 |            |
| <i>N. quercina</i>             | JZB380134          | OP753615                  |             | OQ032581    | OP998326    | OP753687 |            |
| <i>N. quercina</i>             | JZB380136          | OP753616                  |             | OQ032582    | OP998328    | OP753688 |            |
| <i>N. quercina</i>             | JZB380137          | OP753617                  |             | OQ032583    | OP998329    | OP753689 |            |
| <i>N. quercina</i>             | JZB380138          | OP753618                  |             | OQ032584    | OP998330    | OP753690 |            |
| <i>N. quercina</i>             | JZB380139          | OP753619                  |             | OQ032585    |             | OP753691 |            |
| <i>N. quercina</i>             | JZB380140          | OP753620                  |             | OQ032586    | OP998331    | OP753692 |            |
| <i>N. quercina</i>             | JZB380141          | OP753621                  |             | OQ032587    | OP998332    | OP753693 |            |
| <i>N. quercina</i>             | JZB380142          | OP753622                  |             | OQ032588    | OP998333    | OP753694 |            |
| <i>N. quercina</i>             | JZB380143          | OP753623                  |             |             |             | OP753695 |            |
| <i>N. quercina</i>             | JZB380144          | OP753624                  |             | OQ032589    | OP998334    | OP753696 |            |
| <i>N. quercina</i>             | MFLUCC 18-1588     | MH827008                  |             | MH853672    | MH853665    | MH827029 |            |
| <i>N. variabilis</i>           | UTHSC DI16-285     | NR158280                  |             | LT593008    | LT593008    | LT593078 |            |
| <i>Phaeoacremonium alvesii</i> | CSN1239            |                           |             | KY906785    |             |          | KY906784   |
| <i>P. alvesii</i>              | CSN1335            |                           |             | KY906801    |             |          | KY906800   |
| <i>P. aureum</i>               | CBS 142690         |                           |             | KY906799    |             |          | KY906798   |
| <b><i>P. aureum</i></b>        | <b>CBS 142691T</b> |                           |             | KY906657    |             |          | KY906656   |

| Species                               | Isolate            | GenBank accession numbers |             |             |             |          |            |
|---------------------------------------|--------------------|---------------------------|-------------|-------------|-------------|----------|------------|
|                                       |                    | ITS                       | <i>tef1</i> | <i>tub2</i> | <i>rpb2</i> | LSU      | <i>act</i> |
| <i>P. australiense</i>                | CSN490             |                           |             | KY906729    |             |          | KY906728   |
| <i>P. australiense</i>                | CSN657             |                           |             | KY906735    |             |          | KY906734   |
| <i>P. griseorubrum</i>                | PMM1828            |                           |             | KY906851    |             |          | KY906850   |
| <i>P. griseorubrum</i>                | PMM1895            |                           |             | KY906875    |             |          | KY906874   |
| <i>P. italicum</i>                    | CSN59              |                           |             | KY906677    |             |          | KY906676   |
| <i>P. italicum</i>                    | CSN119             |                           |             | KY906691    |             |          | KY906690   |
| <i>P. junior</i>                      | <b>CBS 142695T</b> |                           |             | KY906651    |             |          | KY906650   |
| <i>P. junior</i>                      | CBS 142696         |                           |             | KY906653    |             |          | KY906652   |
| <i>P. parasiticum</i>                 | CSN72              |                           |             | KY906683    |             |          | KY906682   |
| <i>P. parasiticum</i>                 | CSN79              |                           |             | KY906687    |             |          | KY906686   |
| <b><i>P. paululum</i></b>             | <b>CBS 142705T</b> |                           |             | KY906881    |             |          | KY906880   |
| <b><i>P. proliferatum</i></b>         | <b>CBS 142706T</b> |                           |             | KY906903    |             |          | KY906902   |
| <i>P. proliferatum</i>                | CBS 142707         |                           |             | KY906827    |             |          | KY906826   |
| <i>P. scolyti</i>                     | CSN27              |                           |             | KY906661    |             |          | KY906660   |
| <i>P. scolyti</i>                     | CSN55              |                           |             | KY906671    |             |          | KY906670   |
| <i>P. scolyti</i>                     | JZB3190015         |                           |             | OR831988    |             |          | OR831985   |
| <i>P. scolyti</i>                     | JZB3190016         |                           |             | OR831989    |             |          | OR831986   |
| <i>P. scolyti</i>                     | JZB3190017         |                           |             | OR831990    |             |          | OR831987   |
| <i>P. subulatum</i>                   | CSN42              |                           |             | KY906663    |             |          | KY906662   |
| <i>P. subulatum</i>                   | CSN51              |                           |             | KY906669    |             |          | KY906668   |
| <i>P. venezuelense</i>                | PMM1138            |                           |             | KY906835    |             |          | KY906834   |
| <b><i>Pleurostoma richardsiae</i></b> | <b>CBS 270.33T</b> |                           |             | AY579334    |             |          | AY579271   |
| <i>Barriopsis iraniana</i>            | CBS 124698         | MH863399                  |             |             | KX463949    | MH874917 |            |
| <i>Botryosphaeria agaves</i>          | MFLUCC 10-0051     | JX646790                  | JX646855    | JX646840    |             |          |            |

| Species                | Isolate     | GenBank accession numbers |             |             |             |          |            |
|------------------------|-------------|---------------------------|-------------|-------------|-------------|----------|------------|
|                        |             | ITS                       | <i>tef1</i> | <i>tub2</i> | <i>rpb2</i> | LSU      | <i>act</i> |
| <i>B. agaves</i>       | CBS 133992T | JX646791                  | JX646856    | JX646841    |             |          |            |
| <i>B. cortices</i>     | CBS 119047T | DQ299245                  | EU017539    | EU673107    |             |          |            |
| <i>B. cortices</i>     | ATCC 22927  | DQ299247                  | EU673291    | EU673108    |             |          |            |
| <i>B. auasmontanum</i> | CBS 121769T | EU101303                  | EU101348    |             |             |          |            |
| <i>B. dothidea</i>     | CBS 115476  |                           |             |             | GU357802    | DQ377852 |            |
| <i>B. dothidea</i>     | CBS 110302  | AY259092                  | AY573218    | EU673106    |             |          |            |
| <i>B. dothidea</i>     | CBS 110484  | AY236949                  | AY236898    | AY236927    |             |          |            |
| <i>B. dothidea</i>     | CBS 121768  | EU101306                  | EU101351    |             |             |          |            |
| <i>B. dothidea</i>     | JZB310244   | OP926938                  | OQ032594    | OQ032630    |             |          |            |
| <i>B. dothidea</i>     | JZB310245   | OP926939                  | OQ032595    | OQ032631    |             |          |            |
| <i>B. dothidea</i>     | JZB310246   | OP926940                  | OQ032596    | OQ032632    |             |          |            |
| <i>B. dothidea</i>     | JZB310247   | OP926941                  | OQ032597    | OQ032633    |             |          |            |
| <i>B. dothidea</i>     | JZB310248   | OP926942                  | OQ032598    | OQ032634    |             |          |            |
| <i>B. dothidea</i>     | JZB310249   | OP926943                  | OQ032599    | OQ032635    |             |          |            |
| <i>B. dothidea</i>     | JZB310250   | OP926944                  | OQ032600    | OQ032636    |             |          |            |
| <i>B. dothidea</i>     | JZB310251   | OP926945                  | OQ032601    | OQ032637    |             |          |            |
| <i>B. dothidea</i>     | JZB310252   | OP926946                  | OQ032602    | OQ032638    |             |          |            |
| <i>B. dothidea</i>     | JZB310253   | OP926947                  | OQ032603    | OQ032639    |             |          |            |
| <i>B. dothidea</i>     | JZB310254   | OP926948                  | OQ032604    | OQ032640    |             |          |            |
| <i>B. dothidea</i>     | JZB310255   | OP926949                  | OQ032605    | OQ032641    |             |          |            |
| <i>B. dothidea</i>     | JZB310256   | OP926950                  | OQ032606    | OQ032642    |             |          |            |
| <i>B. dothidea</i>     | JZB310257   | OP926951                  | OQ032607    | OQ032643    |             |          |            |
| <i>B. dothidea</i>     | JZB310258   | OP926952                  | OQ032608    | OQ032644    |             |          |            |
| <i>B. dothidea</i>     | JZB310259   | OP926953                  | OQ032609    | OQ032645    |             |          |            |

| Species                       | Isolate            | GenBank accession numbers |             |             |             |     |
|-------------------------------|--------------------|---------------------------|-------------|-------------|-------------|-----|
|                               |                    | ITS                       | <i>tef1</i> | <i>tub2</i> | <i>rpb2</i> | LSU |
| <i>B. dothidea</i>            | JZB310260          | OP926954                  | OQ032610    | OQ032646    |             |     |
| <i>B. dothidea</i>            | JZB310261          | OP926955                  | OQ032611    | OQ032647    |             |     |
| <i>B. dothidea</i>            | JZB310262          | OP926956                  | OQ032612    | OQ032648    |             |     |
| <i>B. dothidea</i>            | JZB310263          | OP926957                  | OQ032613    | OQ032649    |             |     |
| <i>B. dothidea</i>            | JZB310264          | OP926958                  | OQ032614    | OQ032650    |             |     |
| <i>B. dothidea</i>            | JZB310265          | OP926959                  |             |             |             |     |
| <i>B. dothidea</i>            | JZB310266          | OP926960                  | OQ032615    | OQ032651    |             |     |
| <i>B. dothidea</i>            | JZB310267          | OP926961                  | OQ032616    | OQ032652    |             |     |
| <i>B. dothidea</i>            | JZB310268          | OP926962                  | OQ032617    | OQ032653    |             |     |
| <i>B. dothidea</i>            | JZB310269          | OP926963                  | OQ032618    | OQ032654    |             |     |
| <i>B. dothidea</i>            | JZB310270          | OP926964                  | OQ032619    | OQ032655    |             |     |
| <i>B. dothidea</i>            | JZB310271          | OP926965                  | OQ032620    | OQ032656    |             |     |
| <i>B. dothidea</i>            | JZB310272          | OP926966                  | OQ032621    | OQ032657    |             |     |
| <i>B. dothidea</i>            | JZB310273          | OP926967                  | OQ032622    | OQ032658    |             |     |
| <i>B. dothidea</i>            | JZB310274          | OP926968                  | OQ032623    |             |             |     |
| <i>B. dothidea</i>            | JZB310275          | OP926969                  | OQ032624    | OQ032659    |             |     |
| <i>B. dothidea</i>            | JZB310276          | OP926970                  | OQ032625    | OQ032660    |             |     |
| <i>B. dothidea</i>            | CBS 116777         | AY786320                  | AY786317    |             |             |     |
| <b><i>B. fabicerciana</i></b> | <b>CMM27121</b>    | HQ332198                  | HQ332214    | KF779069    |             |     |
| <i>B. fabicerciana</i>        | CERC 2006          | KX277978                  | KX278083    | KX278188    |             |     |
| <b><i>B. kuwatsukai</i></b>   | <b>CBS 135219T</b> | KX197074                  | KX197094    | KX197101    |             |     |
| <i>B. kuwatsukai</i>          | LSP5               | KJ433395                  | KJ433417    |             |             |     |
| <i>B. minutispermata</i>      | GAAS-01            | KX447675                  | KX447678    |             |             |     |
| <i>B. minutispermata</i>      | GAAS-02            | KX447676                  | KX447679    |             |             |     |

| Species                  | Isolate       | GenBank accession numbers |             |             |             |     |            |
|--------------------------|---------------|---------------------------|-------------|-------------|-------------|-----|------------|
|                          |               | ITS                       | <i>tef1</i> | <i>tub2</i> | <i>rpb2</i> | LSU | <i>act</i> |
| <i>B. qingyuanensis</i>  | CERC 2946T    | KX278000                  | KX278105    | KX278209    |             |     |            |
| <i>B. qingyuanensis</i>  | CERC 2947     | KX278001                  | KX278106    | KX278210    |             |     |            |
| <i>B. ramose</i>         | CBS122069T    | EU144055                  | EU144070    | KF766132    |             |     |            |
| <i>B. rosaceae</i>       | LSP5          | KJ433395                  | KJ433417    |             |             |     |            |
| <i>B. scharifii</i>      | CBS 124702    | JQ772019                  | JQ772056    |             |             |     |            |
| <i>B. scharifii</i>      | CBS 124703T   | JQ772020                  | JQ772057    |             |             |     |            |
| <i>B. sinensis</i>       | CGMCC 3.17723 | KT343256                  | KU221234    | KX197108    |             |     |            |
| <i>B. sinensis</i>       | CGMCC 3.17724 | KU997394                  | KU997130    | KU997568    |             |     |            |
| <i>B. wangensis</i>      | CERC 2299     | KT343254                  | KU221233    | KX197107    |             |     |            |
| <i>B. wangensis</i>      | CERC 2298     | KX278002                  | KX278107    | KX278211    |             |     |            |
| <i>Diplodia.africana</i> | CBS 120835T   | EF445343                  | EF445382    | KF766129    |             |     |            |
| <i>D. africana</i>       | CBS 121104    | EF445344                  | EF445383    |             |             |     |            |
| <i>D. allocellula</i>    | CBS 130408T   | JQ239397                  | JQ239384    | JQ239378    |             |     |            |
| <i>D. allocellula</i>    | CBS 130410    | JQ239399                  | JQ239386    | JQ239380    |             |     |            |
| <i>D. bugarica</i>       | CBS 124136    | MH863355                  | GQ923822    | MT592475    |             |     |            |
| <i>D. bugarica</i>       | CBS 124135T   | GQ923852                  | GQ923820    | MT592474    |             |     |            |
| <i>D. citricarpa</i>     | CBS 124714    | MT587336                  | MT592039    | MT592478    |             |     |            |
| <i>D. citricarpa</i>     | CBS 124715T   | KF890207                  | KF890189    | KX464784    |             |     |            |
| <i>D. corticola</i>      | CBS 112549    | AY259100                  | AY573227    | DQ458853    |             |     |            |
| <i>D. corticola</i>      | CBS 112546    | AY259090                  | EU673310    | EU673117    |             |     |            |
| <i>D. cupressi</i>       | CBS 120692    | MT587338                  | MT592043    | MT592485    |             |     |            |
| <i>D. cupressi</i>       | CBS 168.87T   | DQ458893                  | DQ458878    | DQ458861    |             |     |            |
| <i>D. eriobotryicola</i> | CBS 140851T   | MT587342                  | MT592047    | MT592489    |             |     |            |
| <i>D. eriobotryicola</i> | CPC 29680     | KT240355                  | KT240193    | MG015806    |             |     |            |



| Species                     | Isolate            | GenBank accession numbers |             |             |             |     |
|-----------------------------|--------------------|---------------------------|-------------|-------------|-------------|-----|
|                             |                    | ITS                       | <i>tef1</i> | <i>tub2</i> | <i>rpb2</i> | LSU |
| <i>D. estuarina</i>         | <b>CBS 139666T</b> | KP860831                  | KP860676    | KP860754    |             |     |
| <i>D. estuarina</i>         | CBS 139668         | MT587344                  | MT592049    | MT592491    |             |     |
| <i>D. fraxin</i>            | <b>CBS 136010T</b> | KF307700                  | KF318747    | MG015807    |             |     |
| <i>D. fraxin</i>            | CBS 136011         | KF307711                  | KF318758    | MG015808    |             |     |
| <i>D. mutila</i>            | <b>CBS 136014T</b> | KJ361837                  | KJ361829    | MG015815    |             |     |
| <i>D. mutila</i>            | CBS 136017         | KJ361840                  | KJ361832    | MT592514    |             |     |
| <i>D. mutila</i>            | CMW 7060           | AY236955                  | AY236904    | AY236933    |             |     |
| <i>D. pseudoseniata</i>     | <b>CBS 124906T</b> | EU080927                  | EU863181    | MG015820    |             |     |
| <i>D. pseudoseniata</i>     | CBS 125527         | MH863604                  | MT592059    | MT592501    |             |     |
| <i>D. sapinea</i>           | <b>CBS 393.84T</b> | DQ458895                  | DQ458880    | DQ458863    |             |     |
| <i>D. sapinea</i>           | CBS 591.84         | MT587367                  | MT592073    | MT592530    |             |     |
| <i>D. scrobiculata</i>      | CBS 113297         | KX464102                  | AY624254    | AY624259    |             |     |
| <i>D. scrobiculata</i>      | <b>CBS 118110T</b> | AY253292                  | AY624253    | AY624258    |             |     |
| <i>D. seriata</i>           | JZB310240          | OP926934                  | OQ032590    | OQ032626    |             |     |
| <i>D. seriata</i>           | JZB310241          | OP926935                  | OQ032591    | OQ032627    |             |     |
| <i>D. seriata</i>           | JZB310242          | OP926936                  | OQ032592    | OQ032628    |             |     |
| <i>D. seriata</i>           | JZB310243          | OP926937                  | OQ032593    | OQ032629    |             |     |
| <i>D. seriata</i>           | <b>CBS 112555T</b> | AY259094                  | AY573220    | DQ458856    |             |     |
| <i>D. seriata</i>           | CBS 124137         | MT587384                  | GQ923845    | MT592559    |             |     |
| <i>D. seriata</i>           | CBS 215.25         | MT587388                  | MT592099    | MT592568    |             |     |
| <i>D. seriata</i>           | CBS 585.50         | MT587389                  | MT592100    | MT592569    |             |     |
| <i>Neofusicoccum arbuti</i> | CBS 116131         | AY819720                  | KF531792    | KF531793    |             |     |
| <i>N. arbuti</i>            | CBS 117090         | AY819724                  | KF531791    | KF531794    |             |     |
| <i>N. brasiliense</i>       | CMM1285            | JX513628                  | JX513608    | KC794030    |             |     |

| Species                       | Isolate               | GenBank accession numbers |             |             |             |          |            |
|-------------------------------|-----------------------|---------------------------|-------------|-------------|-------------|----------|------------|
|                               |                       | ITS                       | <i>tef1</i> | <i>tub2</i> | <i>rpb2</i> | LSU      | <i>act</i> |
| <i>N. brasiliense</i>         | <b>CMM1338T</b>       | JX513630                  | JX513610    | KC794031    |             |          |            |
| <i>N. cordaticola</i>         | <b>CBS 123634T</b>    | EU821898                  | EU821868    | EU821838    |             |          |            |
| <i>N. cordaticola</i>         | CBS 123635            | EU821903                  | EU821873    | EU821843    |             |          |            |
| <i>N. illicii</i>             | CGMCC 3.18311         | KY350150                  | KY817756    | KY350156    |             |          |            |
| <i>N. illicii</i>             | <b>CGMCC 3.18310T</b> | KY350149                  |             | KY350155    |             |          |            |
| <i>N. kwambonambiense</i>     | <b>CBS 123639T</b>    | EU821900                  | EU821870    | EU821840    |             |          |            |
| <i>N. kwambonambiense</i>     | CBS 123641            | EU821919                  | EU821889    | EU821859    |             |          |            |
| <i>N. macroclavatum</i>       | <b>CBS 118223T</b>    | DQ093196                  | DQ093217    | DQ093206    |             |          |            |
| <i>N. nonquaesitum</i>        | <b>CBS 126655T</b>    | GU251163                  | GU251295    | GU251823    |             |          |            |
| <i>N. nonquaesitum</i>        | CBS 133501            | MT587498                  | MT592213    | MT592705    |             |          |            |
| <i>N. nonquaesitum</i>        | PD301                 | GU251164                  | GU251296    | GU251824    |             |          |            |
| <i>N. occulatum</i>           | <b>CBS 128008T</b>    | EU301030                  | EU339509    | EU339472    |             |          |            |
| <i>N. occulatum</i>           | CBS 519.74            | MT587499                  | MT592214    | MT592706    |             |          |            |
| <i>N. occulatum</i>           | JZB3120010            | OR449404                  | OR514830    | OR514833    |             |          |            |
| <i>N. occulatum</i>           | JZB3120011            | OR449405                  | OR514831    | OR514834    |             |          |            |
| <i>N. occulatum</i>           | JZB3120012            | OR449406                  | OR514832    | OR514835    |             |          |            |
| <i>N. ribis</i>               | CBS 114306            | MT587514                  | MT592229    | MT592721    |             |          |            |
| <i>N. ribis</i>               | <b>CBS 115475T</b>    | AY236935                  | AY236877    | AY236906    |             |          |            |
| <i>N. sinense</i>             | <b>CGMCC 3.18315T</b> | KY350148                  | KY817755    | KY350154    |             |          |            |
| <i>N. sinoeucalypti</i>       | <b>CGMCC 3.18752T</b> | KX278061                  | KX278166    | KX278270    |             |          |            |
| <i>N. sinoeucalypti</i>       | CERC 3415             | KX278063                  | KX278168    | KX278272    |             |          |            |
| <i>Phaeobotryon aplospora</i> | CFCC 53774            | MN215836                  | MN205996    |             |             | MN215871 |            |
| <i>P. aplospora</i>           | <b>CFCC 53775T</b>    | MN215837                  |             |             |             | MN215872 |            |
| <i>P. aplospora</i>           | CFCC 53776            | MN215838                  | MN205997    |             |             | MN215873 |            |

| Species                       | Isolate               | GenBank accession numbers |             |             |             |          |
|-------------------------------|-----------------------|---------------------------|-------------|-------------|-------------|----------|
|                               |                       | ITS                       | <i>tef1</i> | <i>tub2</i> | <i>rpb2</i> | LSU      |
| <i>P. mamane</i>              | CPC 12442             | EU673333                  | EU673299    |             |             | DQ377899 |
| <b><i>P. mamane</i></b>       | <b>CBS 122980T</b>    | KF766209                  | EU673298    |             |             | EU673248 |
| <i>P. mamane</i>              | CPC 12443             | EU673334                  | EU673300    |             |             | EU673249 |
| <i>P. negundinis</i>          | CAA797                | KX061513                  | KX061507    |             |             |          |
| <i>P. negundinis</i>          | CAA798                | KX061514                  | KX061508    |             |             |          |
| <i>P. rhoinum</i>             | CFCC 52449            | MH133923                  | MH133957    |             |             | MH133940 |
| <b><i>P. rhoinum</i></b>      | <b>CFCC 52450T</b>    | MH133924                  | MH133958    |             |             | MH133941 |
| <i>P. rhoinum</i>             | CFCC 52451            | MH133925                  | MH133959    |             |             | MH133942 |
| <i>P. rhois</i>               | CFCC 89662            | KM030584                  | KM030598    |             |             | KM030591 |
| <b><i>P. rhois</i></b>        | <b>CFCC 52448T</b>    | MH133922                  | MH133956    |             |             | MH133939 |
| <i>P. rhois</i>               | JZB3600007            | OR431839                  | OR514836    |             |             | OR482137 |
| <i>P. rhois</i>               | JZB3600008            | OR431840                  |             |             |             | OR482138 |
| <i>P. rhois</i>               | JZB3600009            | OR431841                  | OR514837    |             |             | OR482139 |
| <b><i>P. ulmi</i></b>         | <b>CBS 138854T</b>    | MT587540                  | MT592274    |             |             | MT587321 |
| <i>P. ulmi</i>                | CBS 114123            | MT587539                  | MT592273    |             |             | MT587320 |
| <i>P. cupressi</i>            | IRAN1454C             | FJ919673                  | FJ919662    |             |             |          |
| <i>P. cupressi</i>            | IRAN 1445C            | KF766208                  | KF766428    |             |             | KF766295 |
| <i>P. cupressi</i>            | CBS 124700T           | MH863400                  |             |             |             |          |
| <i>Lasiodiplodia acaciae</i>  | <b>CBS 136434T</b>    | MT587421                  | MT592133    | MT592613    |             |          |
| <b><i>L. aquilariae</i></b>   | <b>CGMCC 3.18471T</b> | KY783442                  | KY848600    | –           |             |          |
| <b><i>L. avicenniae</i></b>   | <b>CBS 139670T</b>    | KP860835                  | KP860680    | KP860758    |             |          |
| <b><i>L. avicenniae</i></b>   | <b>LAS 199</b>        | KU587957                  | KU587947    | KU587868    |             |          |
| <b><i>L. brasiliensis</i></b> | <b>CMM 4015T</b>      | JX464063                  | JX464049    | –           |             |          |
| <i>L. brasiliensis</i>        | CMM 4469              | KT325574                  | KT325580    | –           |             |          |

| Species                    | Isolate               | GenBank accession numbers |             |             |             |     |
|----------------------------|-----------------------|---------------------------|-------------|-------------|-------------|-----|
|                            |                       | ITS                       | <i>tef1</i> | <i>tub2</i> | <i>rpb2</i> | LSU |
| <i>L. bruguierae</i>       | <b>CBS 139669T</b>    | KP860832                  | KP860677    | KP860755    |             |     |
| <i>L. bruguierae</i>       | CBS 141453            | KP860834                  | KP860679    | KP860757    |             |     |
| <i>L. caatinguensis</i>    | <b>CMM 1325T</b>      | KT154760                  | KT008006    | KT154767    |             |     |
| <i>L. caatinguensis</i>    | IBL 381               | KT154757                  | KT154751    | KT154764    |             |     |
| <i>L. chiangraiensis</i>   | MFLU 21-0003          | MW760854                  | MW815630    | MW815628    |             |     |
| <i>L. chiangraiensis</i>   | GZAAS 21-0003         | MW760853                  | MW815629    | MW815627    |             |     |
| <i>L. chonburiensis</i>    | PSU-LST002            | LC762194                  | LC762200    | LC762206    |             |     |
| <i>L. chonburiensis</i>    | PSU-LST003            | LC762195                  | LC762201    | LC762207    |             |     |
| <i>L. cinnamomi</i>        | <b>CFCC 51997T</b>    | MG866028                  | MH236799    | MH236797    |             |     |
| <i>L. cinnamomi</i>        | CFCC 51998            | MG866029                  | MH236800    | MH236798    |             |     |
| <i>L. citricola</i>        | CBS 124706            | GU945353                  | GU945339    | KU887504    |             |     |
| <i>L. citricola</i>        | <b>CBS 124707T</b>    | GU945354                  | GU945340    | KU887505    |             |     |
| <i>L. crassispora</i>      | <b>CBS 118741T</b>    | DQ103550                  | DQ103557    | KU887506    |             |     |
| <i>L. crassispora</i>      | CMW 13488             | DQ103552                  | DQ103559    | KU887507    |             |     |
| <i>L. curvata</i>          | <b>CGMCC 3.18456T</b> | KY783437                  | KY848596    | KY848529    |             |     |
| <i>L. curvata</i>          | CGMCC 3.18476         | KY783443                  | KY848601    | KY848532    |             |     |
| <i>L. laeliocattleyae</i>  | <b>CBS 130992T</b>    | JN814397                  | JN814424    | KU887508    |             |     |
| <i>L. laeliocattleyae</i>  | <b>BOT 29</b>         | JN814401                  |             | JN814428    |             |     |
| <i>L. euphorbiaceicola</i> | <b>CMM 3609T</b>      | KF234543                  | KF226689    | KF254926    |             |     |
| <i>L. euphorbiaceicola</i> | CMW 33268             | KU887131                  | KU887008    | KU887430    |             |     |
| <i>L. exigua</i>           | BL184                 | KJ638318                  | KJ638337    | –           |             |     |
| <i>L. exigua</i>           | <b>CBS 137785T</b>    | KJ638317                  | KJ638336    | KU887509    |             |     |
| <i>L. gilanensis</i>       | <b>CBS 124704T</b>    | GU945351                  | GU945342    | KU887511    |             |     |
| <i>L. gilanensis</i>       | CBS 124705            | GU945352                  | GU945341    | KU887510    |             |     |

| Species                  | Isolate        | GenBank accession numbers |             |             |             |     |
|--------------------------|----------------|---------------------------|-------------|-------------|-------------|-----|
|                          |                | ITS                       | <i>tef1</i> | <i>tub2</i> | <i>rpb2</i> | LSU |
| <i>L. gonubiensis</i>    | CMW 14077T     | AY639595                  | DQ103566    | DQ458860    |             |     |
| <i>L. gonubiensis</i>    | CMW 14078      | AY639594                  | DQ103567    | EU673126    |             |     |
| <i>L. gravistriata</i>   | CMM 4564T      | KT250949                  | KT250950    | –           |             |     |
| <i>L. gravistriata</i>   | CMM 4565       | KT250947                  | KT266812    | –           |             |     |
| <i>L. hormozganensis</i> | CBS 124709T    | GU945355                  | GU945343    | KU887515    |             |     |
| <i>L. hormozganensis</i> | CBS 124708     | GU945356                  | GU945344    | KU887514    |             |     |
| <i>L. iraniensis</i>     | CBS 124710T    | GU945348                  | GU945336    | KU887516    |             |     |
| <i>L. iraniensis</i>     | CBS 124711     | GU945347                  | GU945335    | KU887517    |             |     |
| <i>L. laosensis</i>      | CGMCC 3.18464T | KY783471                  | KY848609    | KY848552    |             |     |
| <i>L. laosensis</i>      | CGMCC 3.18473  | KY783450                  | KY848603    | KY848536    |             |     |
| <i>L. lignicola</i>      | CBS 134112T    | JX646797                  | KU887003    | JX646845    |             |     |
| <i>L. lignicola</i>      | CGMCC 3.18061T | KX499889                  | KX499927    | KX500002    |             |     |
| <i>L. macrospora</i>     | CMM 3833T      | KF234557                  | KF226718    | KF254941    |             |     |
| <i>L. mahajangana</i>    | CBS 124925T    | FJ900595                  | FJ900641    | FJ900630    |             |     |
| <i>L. mahajangana</i>    | CBS 124926     | FJ900596                  | FJ900642    | FJ900631    |             |     |
| <i>L. margaritacea</i>   | CBS 122065     | EU144051                  | EU144066    | –           |             |     |
| <i>L. margaritacea</i>   | CBS122519T     | EU144050                  | EU144065    |             |             |     |
| <i>L. mediterranea</i>   | CBS 137783T    | KJ638312                  | KJ638331    | KU887521    |             |     |
| <i>L. mediterranea</i>   | CBS 137784     | KJ638311                  | KJ638330    | KU887522    |             |     |
| <i>L. microconidia</i>   | CGMCC 3.18485T | KY783441                  | KY848614    | –           |             |     |
| <i>L. parva</i>          | CBS 456.78T    | EF622083                  | EF622063    | KU887523    |             |     |
| <i>L. parva</i>          | CBS 494.78     | EF622084                  | EF622064    | EU673114    |             |     |
| <i>L. plurivora</i>      | CBS 121103     | AY343482                  | EF445396    | KU887525    |             |     |
| <i>L. plurivora</i>      | STE-U 5803T    | EF445362                  | EF445395    | KP872421    |             |     |

| Species                    | Isolate        | GenBank accession numbers |             |             |             |     |            |
|----------------------------|----------------|---------------------------|-------------|-------------|-------------|-----|------------|
|                            |                | ITS                       | <i>tef1</i> | <i>tub2</i> | <i>rpb2</i> | LSU | <i>act</i> |
| <i>L. pontae</i>           | CMM 1277T      | KT151794                  | KT151791    | KT151797    |             |     |            |
| <i>L. ponkanicola</i>      | CGMCC3.20388   | MW880685                  | MW884188    | MW884214    |             |     |            |
| <i>L. prunus</i>           | JZB3130029     | OR821993                  | OR831982    | OR831991    |             |     |            |
| <i>L. prunus</i>           | JZB3130030     | OR821994                  | OR831983    | OR831992    |             |     |            |
| <i>L. prunus</i>           | JZB3130031     | OR821995                  | OR831984    | OR831993    |             |     |            |
| <i>L. pseudotheobromae</i> | CBS 116459T    | EF622077                  | EF622057    | EU673111    |             |     |            |
| <i>L. pseudotheobromae</i> | CBS 116460     | EF622078                  | EF622058    | KU198428    |             |     |            |
| <i>L. pyriformis</i>       | CBS 121770T    | EU101307                  | EU101352    | KU887527    |             |     |            |
| <i>L. pyriformis</i>       | CBS 121771     | EU101308                  | EU101353    | KU887528    |             |     |            |
| <i>L. rubropurpurea</i>    | CBS 118739T    | DQ103553                  | DQ103571    | EU673136    |             |     |            |
| <i>L. rubropurpurea</i>    | WAC 12536      | DQ103554                  | DQ103572    | KU887530    |             |     |            |
| <i>L. subglobosa</i>       | CMM 3872T      | KF234558                  | KF226721    | KF254942    |             |     |            |
| <i>L. subglobosa</i>       | CMM 4046       | KF234560                  | KF226723    | KF254944    |             |     |            |
| <i>L. syzygii</i>          | MFLUCC 19.0257 | –                         | MW016943    | MW014331    |             |     |            |
| <i>L. thailandica</i>      | CBS 138653     | KM006433                  | KM006464    | –           |             |     |            |
| <i>L. thailandica</i>      | CBS 138760T    | KJ193637                  | KJ193681    | –           |             |     |            |
| <i>L. theobromae</i>       | CBS 111530     | EF622074                  | EF622054    | KU887531    |             |     |            |
| <i>L. theobromae</i>       | CBS 164.96T    | AY640255                  | AY640258    | KU887532    |             |     |            |
| <i>L. tropica</i>          | CGMCC 3.18477  | KY783454                  | KY848616    | KY848540    |             |     |            |
| <i>L. vaccinii</i>         | CGMCC 3.19022T | MH330318                  | MH330327    | MH330324    |             |     |            |
| <i>L. venezuelensis</i>    | CBS 118739T    | DQ103547                  | DQ103568    | KU887533    |             |     |            |
| <i>L. venezuelensis</i>    | CMW 13512      | DQ103548                  | DQ103569    | KU887534    |             |     |            |
| <i>L. viticola</i>         | CBS 128313T    | HQ288227                  | HQ288269    | HQ288306    |             |     |            |
| <i>L. viticola</i>         | CBS 128314     | HQ288228                  | HQ288270    | HQ288307    |             |     |            |

| Species         | Isolate     | GenBank accession numbers |             |             |             |     |            |
|-----------------|-------------|---------------------------|-------------|-------------|-------------|-----|------------|
|                 |             | ITS                       | <i>tef1</i> | <i>tub2</i> | <i>rpb2</i> | LSU | <i>act</i> |
| <i>L. vitis</i> | CBS 124060T | KX464148                  | MN938928    | KX464917    |             |     |            |

CBS: Culture collection of the Centraalbureau voor Schimmelcultures, Fungal Biodiversity Centre, Utrecht, The Netherlands; CPC: Personal collection of P.W. Crous, Utrecht, The Netherlands;

JZB: Beijing Academy of Agriculture and Forestry Sciences culture collection, Beijing, China;

MFLUCC: Mae Fah Luang University Culture Collection, Thailand;

ITS: internal transcribed spacer regions 1 & 2 including 5.8S nrDNA gene; *tub2*: beta-tubulin; *rpb2*: RNA polymerase II second subunit; *tef1*: Partial translation elongation factor 1- $\alpha$ ; LSU: Ribosomal 28S RNA; *act*: actin.
